# Supplementary material
Source: PubMed Central journal article supplement (PMC6603429)
Supplement: NIHMS1032613-supplement-Fig_1.pdf [file NIHMS1032613-supplement-Fig_1.pdf]

**Patient 2**

| Gene          | Diag    | Relapse |
|---------------|---------|---------|
| BRCA1         | 0.46 →  | 0.45    |
| FGFR3         | 0.45 →  | 0.46    |
| DNAH11        | 0.49 →  | 0.45    |
| RNF213        | 0.47 →  | 0.51    |
| <i>PLCE1</i>  | 0.45 →  | 0.5     |
| <i>MAP4K4</i> | 0/331 → | 0.14    |
| <i>DIS3</i>   | 0.1 →   | 5/209   |

**Patient 4**

| Gene     | Diag   | Relapse |
|----------|--------|---------|
| TMEM106C | 0.47 → | 0.41    |
| COL2A1   | 0.48 → | 0.54    |
| LRP1B    | 0.51 → | 0.47    |

**Patient 5**

| Gene         | Diag    | Relapse |
|--------------|---------|---------|
| WWOX         | 0.93 →  | 0.89    |
| NOTCH1       | 0.33 →  | 0.29    |
| <i>KRAS</i>  | 0/375 → | 0.47    |
| <i>WHSC1</i> | 0/504 → | 0.42    |
| <i>DNAH5</i> | 0/563 → | 0.25    |

**Patient 6**

| Gene         | Diag    | Relapse |
|--------------|---------|---------|
| NRAS         | 0.46 →  | 0.49    |
| TMEM106C     | 0.45 →  | 0.50    |
| COL2A1       | 0.45 →  | 0.46    |
| <i>TP53</i>  | 0/593 → | 0.5     |
| <i>EP300</i> | 0/99 →  | 0.22    |

**Patient 7**

| Gene   | Diag   | Relapse |
|--------|--------|---------|
| SLAMF8 | 0.4 →  | 0.49    |
| KRAS   | 0.16 → | 0.35    |
| USP29  | 0.44 → | 0.82    |
| ATR    | 0.50 → | 0.53    |
| ZFH3   | 0.47 → | 0.5     |
| FAT4   | 0.42 → | 0.46    |

**Patient 8**

| Gene | Diag   | Relapse |
|------|--------|---------|
| ATM  | 0.14 → | 0.13    |
| TCF3 | 0.5 →  | 0.53    |

**Patient 9**

| Gene  | Diag   | Relapse |
|-------|--------|---------|
| RUNX1 | 0.49 → | 0.55    |
| PBRM1 | 0.54 → | 0.5     |

**Patient 10**

| Gene         | Diag    | Relapse |
|--------------|---------|---------|
| FAM46C       | 0.39 →  | 0.42    |
| ATM          | 0.45 →  | 0.46    |
| DNAH9        | 0.46 →  | 0.51    |
| EGFR         | 0.5 →   | 0.5     |
| <i>BRCA2</i> | 9/108 → | 0.14    |

**Patient 11**

| Gene         | Diag    | Relapse |
|--------------|---------|---------|
| LRRK2        | 0.89 →  | 0.9     |
| TMEM106C     | 0.51 →  | 0.48    |
| COL2A1       | 0.51 →  | 0.53    |
| <i>KRAS</i>  | 0/273 → | 0.39    |
| <i>ROBO1</i> | 2/378 → | 0.24    |
| <i>LRP1B</i> | 0/255 → | 0.15    |

**Patient 12**

| Gene  | Diag   | Relapse |
|-------|--------|---------|
| ATM   | 0.62 → | 0.59    |
| KRAS  | 0.87 → | 0.82    |
| FOXA2 | 0.52 → | 0.45    |
| SF3B1 | 0.34 → | 0.33    |

**Patient 13**

| Gene   | Diag   | Relapse |
|--------|--------|---------|
| NRAS   | 0.48 → | 0.43    |
| IRF4   | 0.5 →  | 0.43    |
| DNAH11 | 0.5 →  | 0.5     |

**Patient 14**

| Gene         | Diag    | Relapse |
|--------------|---------|---------|
| APC          | 0.3 →   | 0.38    |
| MAP3K1       | 0.29 →  | 0.32    |
| HOX19        | 0.12 →  | 0.13    |
| NOTCH1       | 0.71 →  | 0.7     |
| PTPRT        | 0.54 →  | 0.48    |
| <i>KRAS</i>  | 1/370 → | 0.17    |
| <i>FGFR3</i> | 0.13 →  | 4/498   |

**Patient 15**

| Gene        | Diag   | Relapse |
|-------------|--------|---------|
| FAT4        | 0.45 → | 0.45    |
| KRAS        | 0.45 → | 0.42    |
| DIS3        | 0.97 → | 0.9     |
| <i>CYLD</i> | 0.23 → | 0.70    |

**Patient 16**

| Gene          | Diag   | Relapse |
|---------------|--------|---------|
| CUL4A         | 0.67 → | 0.95    |
| RUNX1         | 0.62 → | 0.7     |
| SP140         | 0.34 → | 0.28    |
| <i>DNMT3A</i> | 0.1 →  | 2/328   |

**Patient 17**

| Gene        | Diag   | Relapse |
|-------------|--------|---------|
| MRE11A      | 0.54 → | 0.61    |
| ARIDIA      | 0.55 → | 0.44    |
| ROS1        | 0.59 → | 0.51    |
| PTPRZ1      | 0.66 → | 0.64    |
| BRAF        | 0.22 → | 0.23    |
| <i>KRAS</i> | 0.1 →  | 0/350   |

**Patient 18**

| Gene     | Diag   | Relapse |
|----------|--------|---------|
| NRAS     | 0.32 → | 0.22    |
| TMEM106C | 0.38 → | 0.44    |
| COL2A1   | 0.41 → | 0.48    |
| MAP3K9   | 0.39 → | 0.42    |
| MAP3K1   | 0.27 → | 0.32    |
| BRAF     | 0.24 → | 0.29    |
| NOTCH1   | 0.26 → | 0.34    |
| KMT2C    | 0.26 → | 0.38    |

**Patient 19**

| Gene          | Diag    | Relapse |
|---------------|---------|---------|
| KRAS          | 0.49 →  | 0.57    |
| <i>CREBBP</i> | 0/295 → | 0.39    |
| <i>ZFH3</i>   | 0/224 → | 0.13    |
| <i>EPHA3</i>  | 0/252 → | 0.11    |
| <i>PNRC1</i>  | 0/107 → | 0.22    |

**Patient 20**

| Gene  | Diag   | Relapse |
|-------|--------|---------|
| NRAS  | 0.44 → | 0.48    |
| PRDM1 | 0.65 → | 0.64    |
| PKHD1 | 0.63 → | 0.65    |

**Patient 21**

| Gene  | Diag   | Relapse |
|-------|--------|---------|
| NRAS  | 0.48 → | 0.49    |
| TRAF3 | 0.94 → | 0.8     |
| NF1   | 0.51 → | 0.4     |
| SF3B1 | 0.47 → | 0.44    |
| EPHA3 | 0.46 → | 0.42    |
| PKHD1 | 0.48 → | 0.49    |

**Patient 22**

| Gene   | Diag   | Relapse |
|--------|--------|---------|
| NRAS   | 0.49 → | 0.5     |
| ERN1   | 0.41 → | 0.34    |
| ACTG1  | 0.44 → | 0.44    |
| MAGED1 | 0.97 → | 0.98    |

**Patient 23**

| Gene         | Diag    | Relapse |
|--------------|---------|---------|
| KRAS         | 0.35 →  | 0.36    |
| DDX1         | 0.54 →  | 0.6     |
| WWOX         | 0.13 →  | 0.08    |
| BRCA1        | 0.47 →  | 0.46    |
| SNX7         | 0.21 →  | 0.18    |
| <i>NCOR1</i> | 0.37 →  | 0/252   |
| <i>TP53</i>  | 0/206 → | 0.59    |

**Patient 24**

| Gene   | Diag    | Relapse |
|--------|---------|---------|
| NRAS   | 0.47 →  | 0.45    |
| WWOX   | 1 →     | 0.64    |
| IKZF3  | 0.51 →  | 0.5     |
| TP53   | 0.47 →  | 0.44    |
| RNF213 | 0.5 →   | 0.55    |
| CYLD   | 4/104 → | 0.18    |

**Patient 25**

| Gene       | Diag  | Relapse |
|------------|-------|---------|
| C11orf30   | 0.31  | → 0.26  |
| WWOX       | 0.18  | → 0.09  |
| LRPB1      | 0.49  | → 0.47  |
| NEB        | 0.55  | → 0.5   |
| SP140      | 0.47  | → 0.45  |
| KRAS G13D  | 4/303 | → 0.42  |
| KRAS A146V | 0.25  | → 2/283 |
| RAG2       | 0.17  | → 4/771 |

**Patient 26**

| Gene   | Diag  | Relapse |
|--------|-------|---------|
| BRCA2  | 0.42  | → 0.43  |
| DIS3   | 0.46  | → 0.46  |
| ARID3A | 0.63  | → 0.62  |
| LRPB1  | 0.32  | → 0.2   |
| PI4KA  | 0.97  | → 0.8   |
| ALK    | 0.45  | → 0.47  |
| ROBO1  | 0.44  | → 0.48  |
| APC    | 0.49  | → 0.53  |
| LRKK2  | 0/355 | → 0.21  |

**Patient 27**

| Gene   | Diag | Relapse |
|--------|------|---------|
| ARID5B | 0.47 | → 0.52  |
| NOTCH2 | 0.38 | → 0.41  |
| CYLD   | 0.46 | → 0.48  |
| DNAH9  | 0.42 | → 0.4   |
| RUNX1  | 0.66 | → 0.65  |
| LRP1B  | 0.45 | → 0.44  |

**Patient 28**

| Gene   | Diag | Relapse |
|--------|------|---------|
| ARID2  | 0.52 | → 0.46  |
| ARID3A | 0.29 | → 0.24  |
| EGR1   | 0.42 | → 0.45  |
| BRAF   | 0.36 | → 0.4   |
| USP9X  | 0.42 | → 0.44  |
| DIS3   | 0.37 | → 0/237 |

**Patient 29**

| Gene | Diag  | Relapse |
|------|-------|---------|
| MGA  | 0.33  | → 0.49  |
| NEB  | 0.36  | → 0.41  |
| BRAF | 0.44  | → 0.46  |
| TET2 | 0/657 | → 0.16  |
| DIS3 | 0.78  | → 0/201 |
| TCF3 | 0.35  | → 0/304 |

**Patient 30**

| Gene   | Diag | Relapse |
|--------|------|---------|
| KRAS   | 0.3  | → 0.38  |
| RNF213 | 0.51 | → 0.47  |
| NFE2L2 | 0.49 | → 0.49  |
| DNMT3A | 0.42 | → 0.47  |
| DNAH11 | 0.51 | → 0.49  |

**Patient 31**

| Gene         | Diag | Relapse |
|--------------|------|---------|
| NRAS         | 0.41 | → 0.99  |
| EP400        | 0.5  | → 0.53  |
| DIS3         | 0.52 | → 0.49  |
| NCOR1        | 0.33 | → 0.35  |
| USP29        | 0.47 | → 0.5   |
| ATR (R1082H) | 0.35 | → 0.29  |
| ATR (V316I)  | 0.32 | → 0.28  |
| PCL0         | 0.35 | → 0.35  |
| KMT2D        | 0.45 | → 0.55  |
| FAM46C       | 0.73 | → 0.99  |

**Patient 32**

| Gene  | Diag | Relapse |
|-------|------|---------|
| KRAS  | 0.48 | → 0.48  |
| KMT2D | 0.56 | → 0.50  |
| BRCA1 | 0.54 | → 0.47  |
| BRCA2 | 0.49 | → 0.5   |
| TSHZ1 | 0.6  | → 0.39  |
| PTPRT | 0.53 | → 0.51  |
| IRF4  | 0.51 | → 0.5   |

**Patient 33**

| Gene   | Diag  | Relapse |
|--------|-------|---------|
| ZFH3   | 0.37  | → 0.36  |
| FANCD2 | 0.43  | → 0.42  |
| SETD2  | 0.49  | → 0.50  |
| TET2   | 1     | → 1     |
| NOTCH4 | 0.39  | → 0.30  |
| NOTCH1 | 0.48  | → 0.39  |
| USP9X  | 0.95  | → 0.97  |
| FANCA  | 0.38  | → 0.33  |
| FAT1   | 0.49  | → 0.61  |
| KRAS   | 0.22  | → 1/727 |
| TRAF3  | 0.59  | → 1/445 |
| NRAS   | 1/461 | → 0.25  |
| WHSC1  | 0/758 | → 0.16  |
| PRDM1  | 0/789 | → 0.13  |
| FAM46C | 2/620 | → 0.21  |

**Patient 34**

| Gene   | Diag  | Relapse |
|--------|-------|---------|
| NRAS   | 0.4   | → 0.42  |
| ADAM29 | 0.40  | → 0.35  |
| CDKN2A | 0.48  | → 0.56  |
| DNAH9  | 0.48  | → 0.48  |
| LRP1B  | 0.39  | → 0.4   |
| PTPRK  | 0/369 | → 0.15  |

**Patient 36**

| Gene  | Diag  | Relapse |
|-------|-------|---------|
| KDM5B | 0/885 | → 0.26  |

**Patient 37**

| Gene | Diag | Relapse |
|------|------|---------|
| FAT3 | 0.35 | → 0.3   |
| DIS3 | 0.54 | → 0.4   |
| RPL5 | 0.33 | → 0.35  |
| ATM  | 0.27 | → 0.23  |

**Patient 39**

| Gene    | Diag  | Relapse |
|---------|-------|---------|
| KRAS    | 0.48  | → 0.45  |
| IRF4    | 0.34  | → 0.1   |
| PIK3C2G | 0/436 | → 0.34  |

**Patient 40**

| Gene  | Diag | Relapse |
|-------|------|---------|
| BIRC3 | 0.26 | → 0.35  |
| KRAS  | 0.33 | → 0.39  |
| SF3B1 | 0.14 | → 0.28  |
| IKZF1 | 0.23 | → 0.28  |

**Patient 44**

| Gene   | Diag | Relapse |
|--------|------|---------|
| TP53   | 0.45 | → 0.47  |
| PTRD   | 0.49 | → 0.47  |
| MAP3K4 | 0.18 | → 0/248 |

**Patient 45**

| Gene  | Diag | Relapse |
|-------|------|---------|
| CCND1 | 0.39 | → 0.37  |
| DNAH9 | 0.35 | → 0.39  |
| IRF4  | 0.38 | → 0.37  |
| NTRK2 | 0.25 | → 0.38  |

**Patient 46**

| Gene   | Diag  | Relapse |
|--------|-------|---------|
| KRAS   | 0.41  | → 0.47  |
| ASAP2  | 0.46  | → 0.46  |
| DNAH11 | 0.38  | → 0.47  |
| USP9X  | 1/202 | → 0.18  |

**Patient 47****Patient 48**

| Gene     | Diag  | Relapse |
|----------|-------|---------|
| ACTG1    | 0.4   | → 0.53  |
| HIST1H1C | 0.39  | → 0.32  |
| BRAF     | 0.28  | → 0.48  |
| NRAS     | 1/199 | → 0.35  |
| RNF213   | 0/412 | → 0.14  |

**Patient 51**

| Gene  | Diag | Relapse |
|-------|------|---------|
| NRAS  | 0.33 | → 0.22  |
| KMT2C | 0.26 | → 0.17  |

**Patient 53**

| Gene | Diag | Relapse |
|------|------|---------|
| KRAS | 0.49 | → 0.45  |
| PTRD | 0.14 | → 0/186 |
