# Supplementary material
Source: PubMed Central journal article supplement (PMC6603429)
Supplement: NIHMS1032613-supplement-Tab_2.pdf [file NIHMS1032613-supplement-Tab_2.pdf]

## Supplemental Table 2

|      | Nb reads | Med. rd length | % aligned | % duplicates | Target enrich. | Padded enrich. | X   | 90 Cov. |
|------|----------|----------------|-----------|--------------|----------------|----------------|-----|---------|
| 2-1  | 18795029 | 199            | 99.7      | 27.8         | 50.6           | 60.4           | 349 | 89      |
| 2-2  | 16522901 | 207            | 99.7      | 26.7         | 51.3           | 61.6           | 316 | 78      |
| 4-1  | 16317062 | 208            | 99.7      | 26.0         | 49.8           | 60.0           | 306 | 102     |
| 4-2  | 15508898 | 216            | 99.7      | 25.0         | 49.9           | 60.5           | 295 | 98      |
| 5-1  | 18151330 | 217            | 99.6      | 27.3         | 50.2           | 60.6           | 337 | 91      |
| 5-2  | 16858016 | 217            | 99.7      | 26.7         | 47.4           | 58.1           | 298 | 81      |
| 6-1  | 17444135 | 225            | 99.7      | 27.2         | 47.1           | 58.4           | 305 | 97      |
| 6-2  | 19124959 | 203            | 99.7      | 28.0         | 47.4           | 57.6           | 332 | 106     |
| 7-1  | 16713787 | 222            | 99.7      | 26.7         | 46.8           | 57.9           | 292 | 107     |
| 7-2  | 15494571 | 233            | 99.7      | 24.6         | 48.4           | 60.1           | 288 | 108     |
| 8-1  | 14870556 | 223            | 99.7      | 24.2         | 47.2           | 58.2           | 271 | 79      |
| 8-2  | 15874492 | 231            | 99.7      | 24.8         | 45.3           | 56.2           | 276 | 85      |
| 9-1  | 16591586 | 204            | 99.8      | 32.2         | 48.4           | 58.7           | 278 | 116     |
| 9-2  | 17053349 | 228            | 99.7      | 26.7         | 49.8           | 61.0           | 317 | 116     |
| 10-1 | 16854050 | 199            | 99.7      | 26.9         | 49.8           | 60.0           | 313 | 51      |
| 10-2 | 17045385 | 176            | 99.7      | 30.0         | 46.6           | 55.5           | 283 | 55      |
| 11-1 | 15374432 | 209            | 99.7      | 26.2         | 46.7           | 57.4           | 270 | 48      |
| 11-2 | 15418401 | 218            | 99.7      | 28.0         | 45.7           | 57.1           | 258 | 11      |
| 12-1 | 13807462 | 214            | 99.7      | 24.7         | 50.1           | 60.1           | 265 | 91      |
| 12-2 | 15202557 | 216            | 99.7      | 25.5         | 51.1           | 61.3           | 294 | 104     |
| 13-1 | 14952771 | 197            | 99.8      | 26.4         | 50.9           | 60.8           | 285 | 92      |
| 13-2 | 16792416 | 187            | 99.7      | 28.3         | 50.4           | 59.7           | 309 | 103     |
| 14-1 | 14641637 | 213            | 99.8      | 24.5         | 48.9           | 60.0           | 275 | 78      |
| 14-2 | 15912609 | 216            | 99.8      | 27.3         | 48.9           | 60.0           | 288 | 95      |
| 15-1 | 12837634 | 248            | 99.7      | 24.3         | 48.5           | 60.1           | 240 | 36      |
| 15-2 | 12756483 | 231            | 99.8      | 22.8         | 49.9           | 61.1           | 250 | 39      |
| 16-1 | 11549446 | 247            | 99.7      | 24.2         | 45.9           | 57.4           | 205 | 80      |
| 16-2 | 13012891 | 248            | 99.7      | 26.5         | 41.4           | 53.6           | 202 | 17      |
| 17-1 | 16403781 | 224            | 99.7      | 25.1         | 46.0           | 56.8           | 288 | 74      |
| 17-2 | 17395425 | 221            | 99.7      | 25.7         | 46.3           | 56.8           | 304 | 74      |
| 18-1 | 18403639 | 223            | 99.7      | 26.0         | 44.7           | 55.6           | 310 | 38      |
| 18-2 | 16575175 | 233            | 99.7      | 26.8         | 44.5           | 55.7           | 275 | 40      |
| 19-1 | 15594159 | 220            | 99.7      | 23.1         | 43.8           | 53.8           | 268 | 79      |
| 19-2 | 14996265 | 242            | 99.7      | 24.8         | 48.3           | 59.3           | 277 | 78      |
| 20-1 | 15549274 | 247            | 99.7      | 26.1         | 44.8           | 55.8           | 262 | 91      |
| 20-2 | 16484626 | 243            | 99.7      | 26.7         | 44.7           | 55.5           | 275 | 90      |
| 21-1 | 18141047 | 237            | 99.8      | 28.7         | 39.0           | 51.1           | 257 | 5       |
| 21-2 | 18637907 | 214            | 99.8      | 28.1         | 40.8           | 51.7           | 278 | 26      |
| 22-1 | 17157890 | 230            | 99.8      | 26.2         | 44.3           | 55.0           | 285 | 29      |
| 22-2 | 17174530 | 204            | 99.8      | 24.2         | 46.7           | 56.7           | 310 | 33      |
| 23-1 | 14487604 | 259            | 99.8      | 26.9         | 47.5           | 61.0           | 256 | 91      |
| 23-2 | 15923120 | 217            | 99.7      | 25.7         | 48.8           | 59.1           | 294 | 102     |
| 24-1 | 14561639 | 220            | 99.7      | 24.6         | 47.8           | 58.3           | 267 | 10      |
| 24-2 | 15342238 | 247            | 99.7      | 25.6         | 46.9           | 58.3           | 273 | 23      |
| 25-1 | 16768873 | 244            | 99.7      | 26.3         | 48.8           | 59.9           | 307 | 113     |
| 25-2 | 18611512 | 226            | 99.7      | 27.7         | 49.4           | 60.2           | 339 | 115     |

|      | Nb reads | Med. rd length | % aligned | % duplicates | Target enrich. | Padded enrich. | X   | 90 Cov. |
|------|----------|----------------|-----------|--------------|----------------|----------------|-----|---------|
| 26-1 | 18406264 | 202            | 99.7      | 28.0         | 47.7           | 58.5           | 322 | 6       |
| 26-2 | 18241799 | 208            | 99.7      | 27.8         | 49.0           | 60.0           | 329 | 24      |
| 27-1 | 15558853 | 198            | 99.7      | 25.1         | 50.1           | 59.8           | 297 | 93      |
| 27-2 | 16684128 | 229            | 99.7      | 24.9         | 49.1           | 59.9           | 313 | 81      |
| 28-1 | 16021091 | 198            | 99.7      | 27.0         | 46.8           | 56.9           | 279 | 81      |
| 28-2 | 15617541 | 216            | 99.7      | 24.9         | 49.2           | 60.1           | 294 | 74      |
| 29-1 | 16972717 | 222            | 99.7      | 26.5         | 51.9           | 62.4           | 330 | 127     |
| 29-2 | 17797894 | 199            | 99.7      | 29.7         | 50.2           | 59.5           | 320 | 127     |
| 30-1 | 16728597 | 232            | 99.7      | 26.5         | 46.4           | 58.3           | 290 | 62      |
| 30-2 | 17303270 | 217            | 99.7      | 28.5         | 46.5           | 58.0           | 293 | 37      |
| 31-1 | 15689807 | 218            | 99.7      | 25.4         | 48.6           | 59.9           | 290 | 70      |
| 31-2 | 14538932 | 223            | 99.7      | 25.0         | 45.9           | 57.7           | 255 | 52      |
| 32-1 | 15588515 | 213            | 99.7      | 33.2         | 42.4           | 52.5           | 225 | 78      |
| 32-2 | 15873726 | 208            | 99.7      | 25.5         | 50.6           | 61.0           | 305 | 98      |
| 33-1 | 30494331 | 217            | 99.7      | 40.9         | 44.0           | 56.5           | 403 | 27      |
| 33-2 | 31950262 | 214            | 99.7      | 41.5         | 44.5           | 56.9           | 424 | 18      |
| 34-0 | 10647206 | 201            | 99.7      | 23.6         | 58.6           | 68.5           | 242 | 97      |
| 34-1 | 28274976 | 194            | 99.6      | 45.2         | 47.1           | 56.6           | 372 | 167     |
| 34-2 | 27555019 | 220            | 99.7      | 38.5         | 52.9           | 63.7           | 456 | 183     |
| 36-0 | 14153854 | 214            | 99.7      | 25.2         | 58.0           | 68.8           | 313 | 138     |
| 36-1 | 29909978 | 200            | 99.7      | 38.5         | 52.0           | 62.6           | 487 | 153     |
| 36-2 | 30451268 | 238            | 99.7      | 39.9         | 52.8           | 65.3           | 491 | 176     |
| 37-0 | 11129976 | 248            | 99.6      | 23.5         | 58.6           | 70.4           | 254 | 110     |
| 37-1 | 26315942 | 256            | 99.6      | 38.8         | 50.5           | 63.2           | 414 | 166     |
| 37-2 | 25379042 | 231            | 99.7      | 38.5         | 51.4           | 63.2           | 408 | 173     |
| 39-0 | 8861769  | 266            | 99.6      | 20.9         | 54.2           | 66.3           | 194 | 90      |
| 39-1 | 25109150 | 236            | 99.7      | 41.3         | 47.1           | 58.6           | 353 | 158     |
| 39-2 | 24111911 | 265            | 99.6      | 38.6         | 45.9           | 58.0           | 346 | 150     |
| 40-0 | 11655494 | 241            | 99.6      | 22.0         | 58.0           | 69.4           | 269 | 106     |
| 40-1 | 28088555 | 204            | 99.6      | 38.4         | 48.7           | 58.6           | 430 | 171     |
| 40-2 | 25045148 | 234            | 99.7      | 33.3         | 53.0           | 64.4           | 450 | 142     |
| 44-0 | 12053076 | 242            | 99.7      | 23.1         | 57.2           | 68.3           | 270 | 106     |
| 44-1 | 22246826 | 244            | 99.6      | 33.7         | 51.8           | 63.1           | 389 | 151     |
| 44-2 | 20877018 | 265            | 99.6      | 35.1         | 50.3           | 62.1           | 347 | 137     |
| 45-0 | 8552386  | 261            | 99.6      | 21.0         | 56.3           | 68.1           | 194 | 80      |
| 45-1 | 24169532 | 225            | 99.7      | 40.8         | 48.1           | 58.6           | 350 | 152     |
| 45-2 | 14877116 | 220            | 99.8      | 29.1         | 60.5           | 71.7           | 325 | 85      |
| 46-0 | 9970305  | 208            | 99.7      | 21.3         | 57.4           | 67.5           | 229 | 97      |
| 46-1 | 24123713 | 247            | 99.7      | 34.6         | 50.2           | 62.0           | 404 | 129     |
| 46-2 | 23757897 | 256            | 99.6      | 34.9         | 50.3           | 62.3           | 396 | 123     |
| 47-0 | 5539988  | 227            | 99.8      | 16.1         | 63.8           | 75.8           | 151 | 58      |
| 47-1 | 11389818 | 215            | 99.8      | 25.6         | 61.4           | 72.8           | 265 | 79      |
| 47-2 | 20922069 | 210            | 99.8      | 34.6         | 58.8           | 69.9           | 410 | 129     |
| 48-0 | 7429122  | 206            | 99.8      | 19.7         | 62.4           | 73.3           | 190 | 73      |
| 48-1 | 11591482 | 235            | 99.7      | 23.0         | 57.2           | 69.6           | 260 | 70      |
| 48-2 | 6990962  | 200            | 99.8      | 21.5         | 58.7           | 69.7           | 164 | 41      |
| 51-0 | 8071940  | 231            | 99.8      | 19.6         | 61.7           | 73.5           | 204 | 83      |
| 51-1 | 4450215  | 197            | 99.8      | 17.9         | 54.0           | 65.7           | 101 | 9       |
| 51-2 | 15045840 | 206            | 99.8      | 30.4         | 58.5           | 69.7           | 312 | 120     |
| 53-0 | 9356950  | 225            | 99.8      | 21.4         | 61.2           | 72.9           | 229 | 89      |
| 53-1 | 13868942 | 214            | 99.8      | 28.1         | 56.6           | 67.9           | 287 | 43      |
| 53-2 | 6193770  | 201            | 99.8      | 19.3         | 58.5           | 69.4           | 149 | 21      |
