# Supplementary material
Source: PubMed Central journal article supplement (PMC6603429)

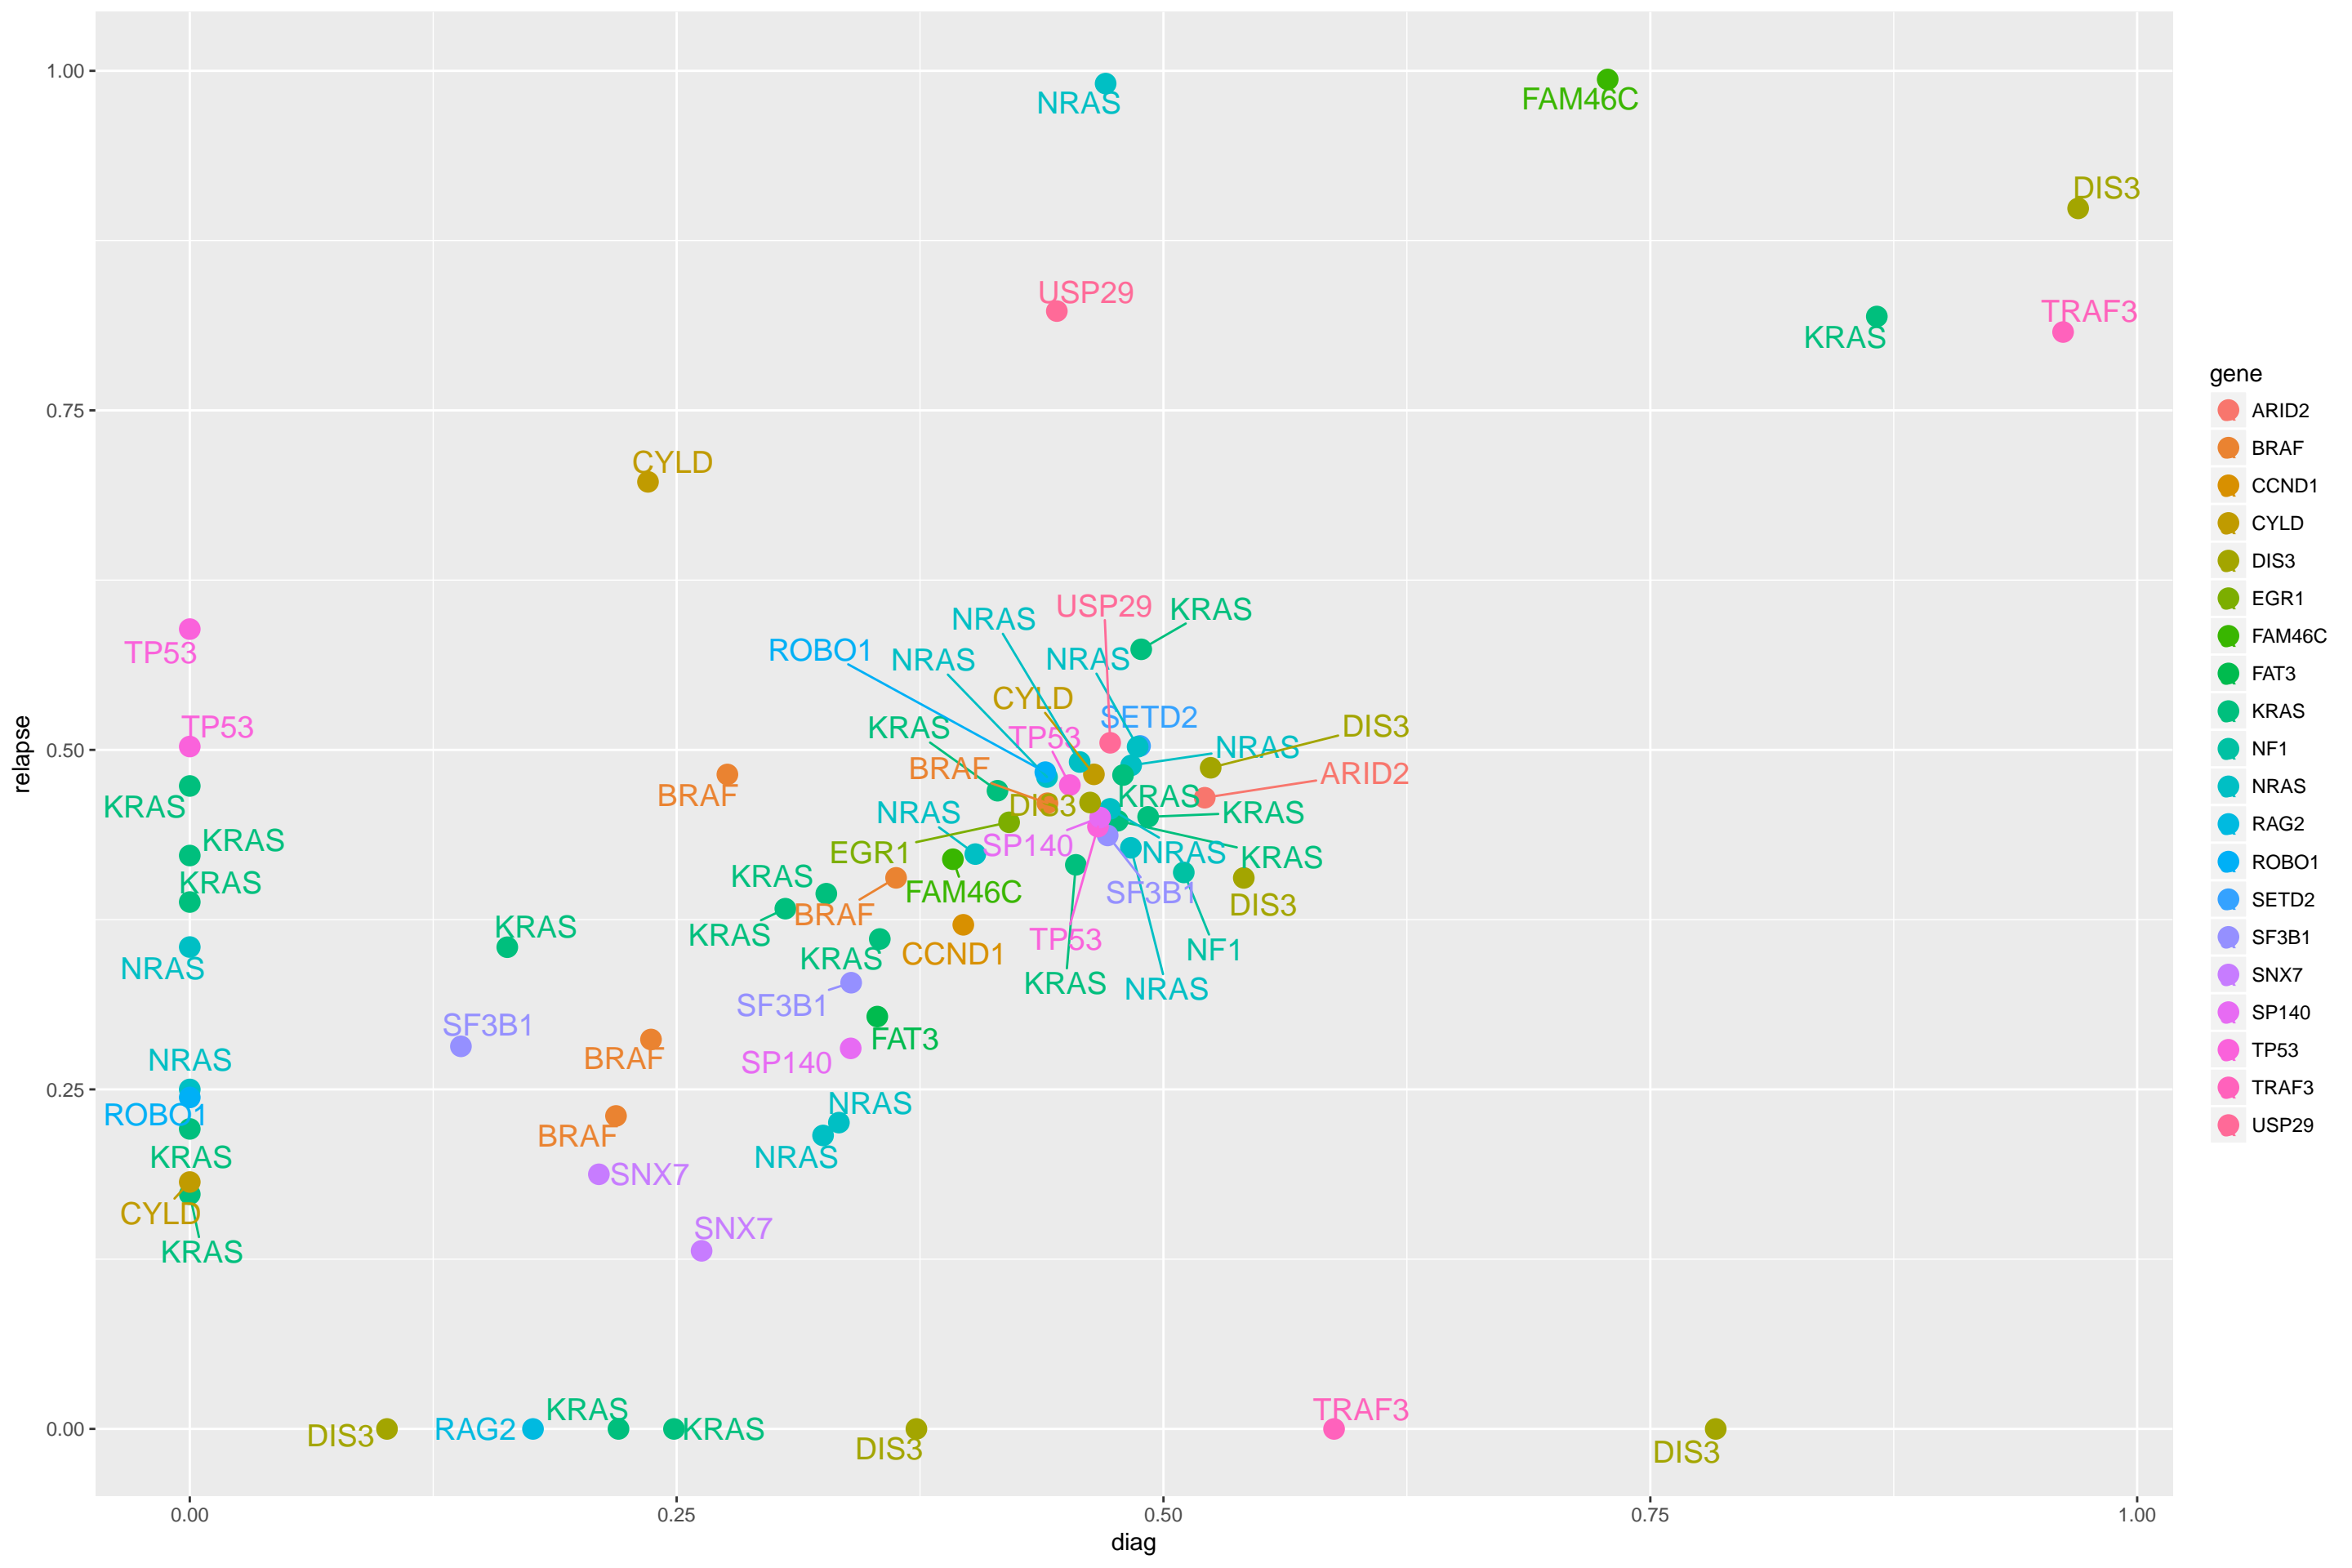

Supplement: NIHMS1032613-supplement-Fig_2.pdf [file NIHMS1032613-supplement-Fig_2.pdf]
